# Supplementary material for: Intelligent metal recovery from spent Li-ion batteries: machine learning breaks the barriers of traditional optimizations
Source: Royal Society of Chemistry journal article supplement (doi:10.1039/d4gc05967k), 2025-01-01
Supplement: d4gc05967k1.pdf [file d4gc05967k1.pdf]

## Supporting Information

### **Intelligent Metal Recovery from Spent Li-ion Batteries: Machine Learning Breaks the Barriers of Traditional Optimizations**

Shanshan E <sup>a</sup>, Bo Niu <sup>b\*</sup>, Jia Liu <sup>c</sup>, Yilin Yuan <sup>b</sup>, Jiefeng Xiao <sup>d</sup> and Zhenming Xu <sup>e</sup>

<sup>a</sup> College of Mechanical and Electrical Engineering, Hebei Agricultural University,  
Hebei, Baoding 07100, China

<sup>b</sup> Key Laboratory of Farmland Ecological Environment of Hebei Province, College of  
Resources and Environmental Science, Hebei Agricultural University, Hebei, Baoding  
071000, China

<sup>c</sup> Xingtai Ecological and Environmental Monitoring Center of Hebei Province, Hebei,  
Xingtai 054000, People's Republic of China

<sup>d</sup> Department of Environmental Science and Engineering, Huaqiao University, Jiemei  
Road 668, Xiamen 361021, China

<sup>e</sup> School of Environmental Science and Engineering, Shanghai Jiao Tong University,  
Shanghai 200240, China

Corresponding author:

Bo Niu

E-mail: [niubo@hebau.edu.cn](mailto:niubo@hebau.edu.cn)

The dataset was collected from the following references about roasting integrated with water leaching for metal recovery from spent LIBs:

- [1] J. Priyadarshini, M. Elangovan, M. Mahdal, M. Jayasudha, Machine-Learning-Assisted Prediction of Maximum Metal Recovery from Spent Zinc–Manganese Batteries, *Processes*, 10 (2022) 1034.
- [2] Y. Tang, X. Qu, B. Zhang, Y. Zhao, H. Xie, J. Zhao, Z. Ning, P. Xing, H. Yin, Recycling of spent lithium nickel cobalt manganese oxides via a low-temperature ammonium sulfation roasting approach, *Journal of cleaner production*, 279 (2021) 123633.
- [3] C. Yang, J. Zhang, Z. Cao, Q. Jing, Y. Chen, C. Wang, Sustainable and Facile Process for Lithium Recovery from Spent  $\text{LiNi}_x\text{Co}_y\text{Mn}_z\text{O}_2$  Cathode Materials via Selective Sulfation with Ammonium Sulfate, *ACS Sustainable Chemistry & Engineering*, 8 (2020) 15732-15739.
- [4] Y. Ma, J. Tang, R. Wanaldi, X. Zhou, H. Wang, C. Zhou, J. Yang, A promising selective recovery process of valuable metals from spent lithium ion batteries via reduction roasting and ammonia leaching, *Journal of Hazardous Materials*, 402 (2021) 123491.
- [5] T. Lin, Y. Wang, S. Jin, D. Mu, J. Zhang, J. Liang, C. Dai, An enhanced strategy based on the pyrolysis of bean dregs for efficient selective recovery of lithium from spent lithium-ion batteries, *Green Chemistry*, 24 (2022) 9552-9564.
- [6] T. Lin, Y. Wang, S. Jin, D. Mu, J. Zhang, J. Liang, C. Dai, An enhanced strategy based on the pyrolysis of bean dregs for efficient selective recovery of lithium from spent lithium-ion batteries, *Green Chemistry*, 24 (2022) 9552-9564.
- [7] C. Liu, H. Ji, J. Liu, P. Liu, G. Zeng, X. Luo, Q. Guan, X. Mi, Y. Li, J. Zhang, An emission-free controlled potassium pyrosulfate roasting-assisted leaching process for selective lithium recycling from spent Li-ion batteries, *Waste Management*, 153 (2022) 52-60.
- [8] J. Lin, L. Li, E. Fan, C. Liu, X. Zhang, H. Cao, Z. Sun, R. Chen, Conversion mechanisms of selective extraction of lithium from spent lithium-ion batteries by sulfation roasting, *ACS applied materials & interfaces*, 12 (2020) 18482-18489.
- [9] E. Fan, L. Li, J. Lin, J. Wu, J. Yang, F. Wu, R. Chen, Low-temperature molten-salt-assisted recovery of valuable metals from spent lithium-ion batteries, *ACS sustainable chemistry & engineering*, 7 (2019) 16144-16150.

- [10] X. Qu, H. Xie, X. Chen, Y. Tang, B. Zhang, P. Xing, H. Yin, Recovery of LiCoO<sub>2</sub> from spent lithium-ion batteries through a low-temperature ammonium chloride roasting approach: thermodynamics and reaction mechanisms, *ACS sustainable chemistry & engineering*, 8 (2020) 6524-6532
- [11] C. Peng, F. Liu, Z. Wang, B.P. Wilson, M. Lundström, Selective extraction of lithium (Li) and preparation of battery grade lithium carbonate (Li<sub>2</sub>CO<sub>3</sub>) from spent Li-ion batteries in nitrate system, *Journal of Power Sources*, 415 (2019) 179-188.
- [12] J. Xiao, J. Li, Z. Xu, Novel approach for in situ recovery of lithium carbonate from spent lithium ion batteries using vacuum metallurgy, *Environmental science & technology*, 51 (2017) 11960-11966.
- [13] . Hu, J. Zhang, H. Li, Y. Chen, C. Wang, A promising approach for the recovery of high value-added metals from spent lithium-ion batteries, *Journal of Power Sources*, 351 (2017) 192-199.
- [14] J. Zhang, J. Hu, W. Zhang, Y. Chen, C. Wang, Efficient and economical recovery of lithium, cobalt, nickel, manganese from cathode scrap of spent lithium-ion batteries, *Journal of cleaner production*, 204 (2018) 437-446.
- [15] A. Zhou, Z. Liu, Z. Liu, Efficient separation of Li and Mn from spent LiMn<sub>2</sub>O<sub>4</sub> cathode materials by NH<sub>4</sub>HSO<sub>4</sub> reduction roasting-selective ammonia leaching, *Separation and Purification Technology*, 332 (2024) 125561.
- [16] Z. Cun, P. Xing, C. Wang, H. Li, S. Ma, Z. Sun, Q. Wang, X. Guan, Stepwise recovery of critical metals from spent NCM lithium-ion battery via calcium hydroxide assisted pyrolysis and leaching, *Resources, Conservation and Recycling*, 202 (2024) 107390.
- [17] D. Wei, W. Wang, L. Jiang, Z. Chang, H. Lei, M. Zhang, H. Anwar, M. Liu, M.A. Hassan, B. Dong, Preferential lithium extraction and regeneration of LiCoO<sub>2</sub> cathodes from spent lithium-ion batteries via two-step (NH<sub>4</sub>)<sub>2</sub>SO<sub>4</sub> roasting approach, *Separation and Purification Technology*, 335 (2024) 126168.
- [18] X. Qu, J. Ma, B. Zhang, J. Zhao, B. Qiu, X. Chen, F. Zhou, X. Li, S. Gao, D. Wang, Fast ammonium sulfate salt assisted roasting for selectively recycling degraded LiFePO<sub>4</sub> cathode, *Journal of Cleaner Production*, 435 (2024) 14042.
- [19] Y. Zha, Y. Li, Z. Fei, C. Fan, Q. Meng, X. Peng, P. Dong, Leaching Li from mixed cathode

materials of spent lithium-ion batteries via carbon thermal reduction, Dalton Transactions, 53 (2024) 5592-5600.

[20] F. Su, Q. Meng, X. Liu, W. Yang, Y. Chen, J. Yang, J. Tang, H. Wang, Y. Ma, X. Zhou, Recovery of valuable metals from spent lithium-ion batteries via zinc powder reduction roasting and cysteine leaching, Science of The Total Environment, 912 (2024) 169541.

[21] Y. Liu, X. Zhang, W. Ma, Q. Zhao, Z. Liang, Research on the recycling of waste lithium battery electrode materials using ammonium sulfate roasting, Materials Chemistry and Physics, 318 (2024) 129221.

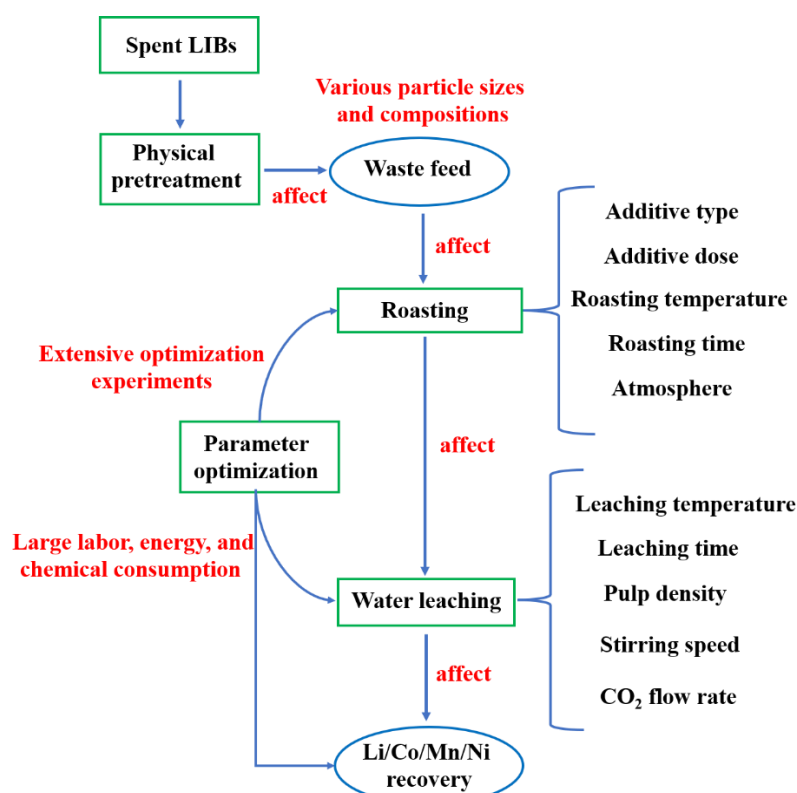

**Fig. S1** The multiple influencing factors on the metal recovery from spent LIBs

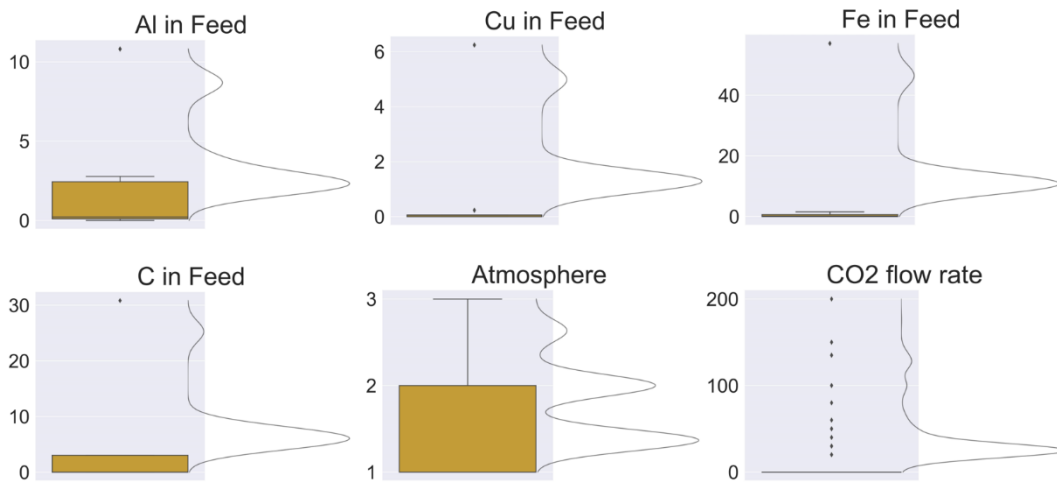

**Figure S2** Box plots representing the descriptive statistics of the data for the other 6 features.

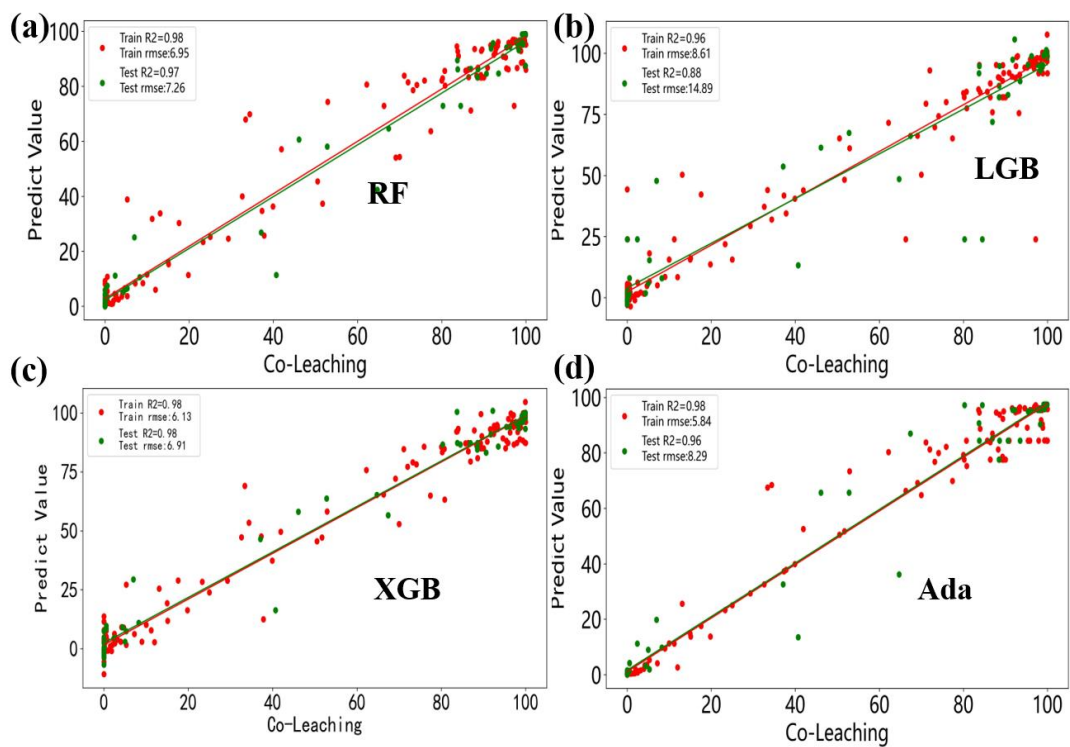

**Figure S3** Scatter plot of predicted leaching efficiency of Co by four ML algorithms

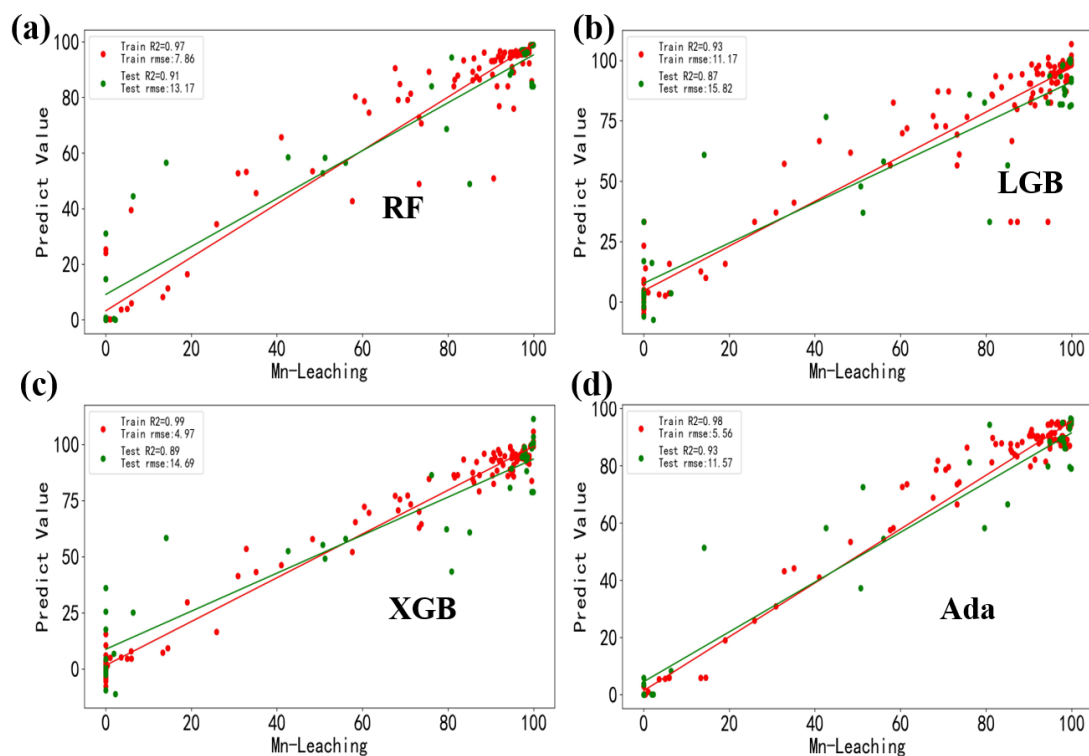

**Figure S4** Scatter plot of predicted leaching efficiency of Mn by four ML algorithms

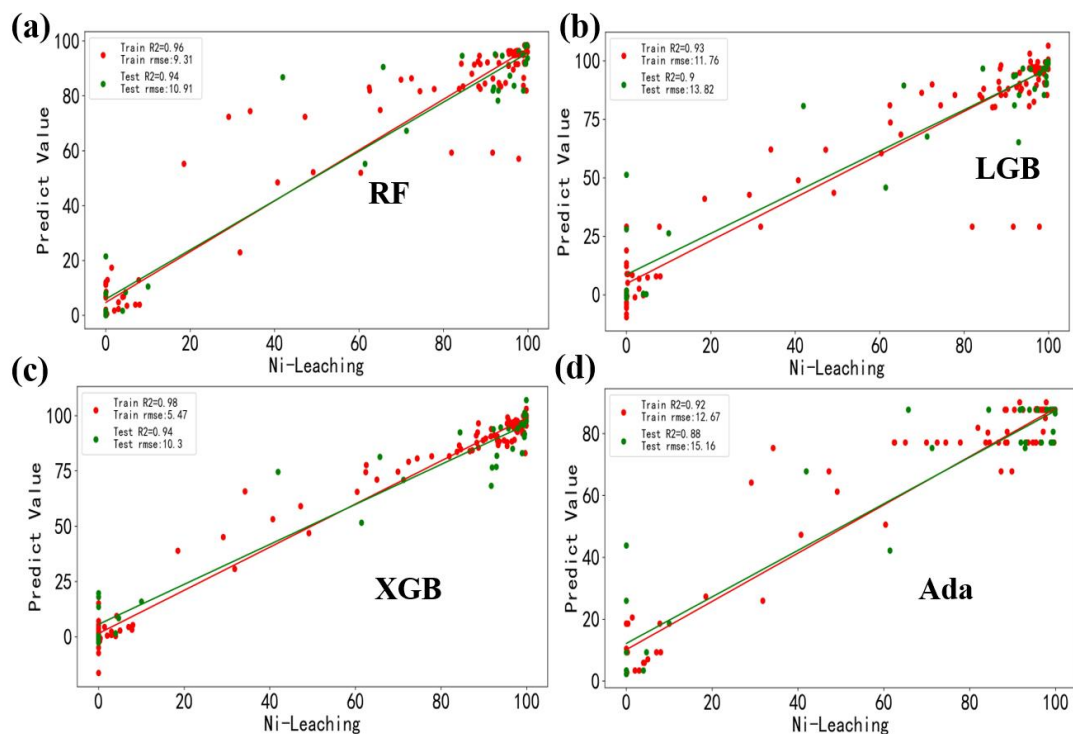

**Figure S5** Scatter plot of predicted leaching efficiency of Ni by four ML algorithms

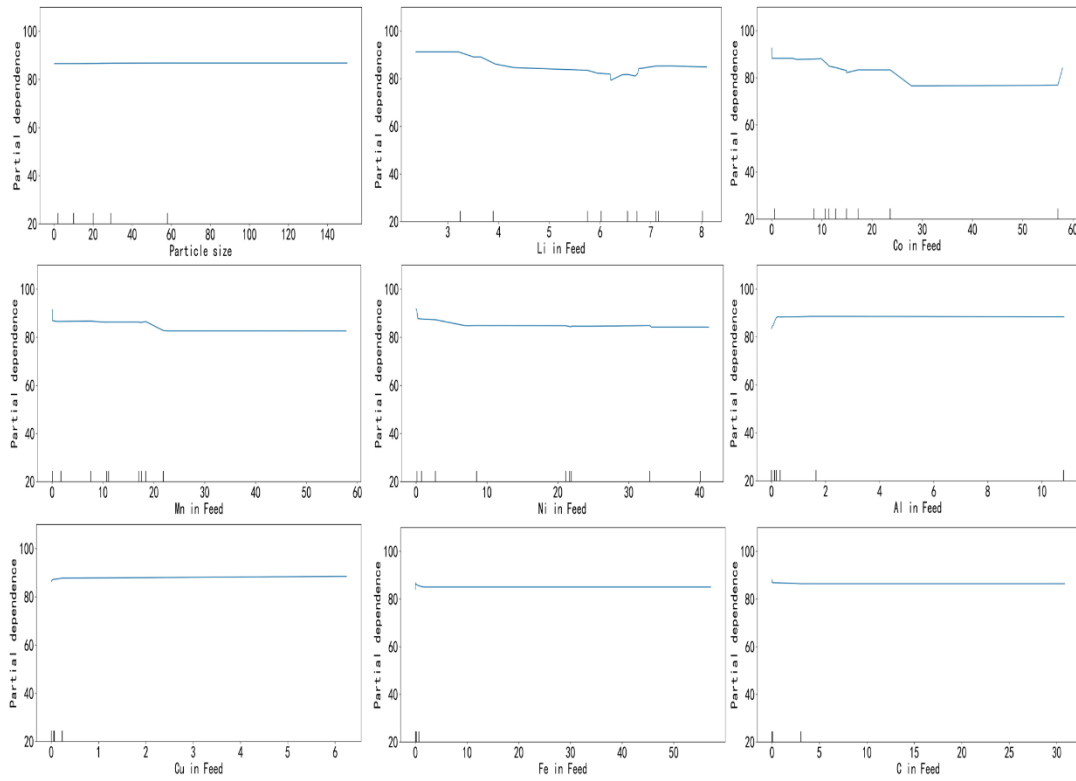

**Figure S6** Partial dependence plots for waste property impacted Li leaching

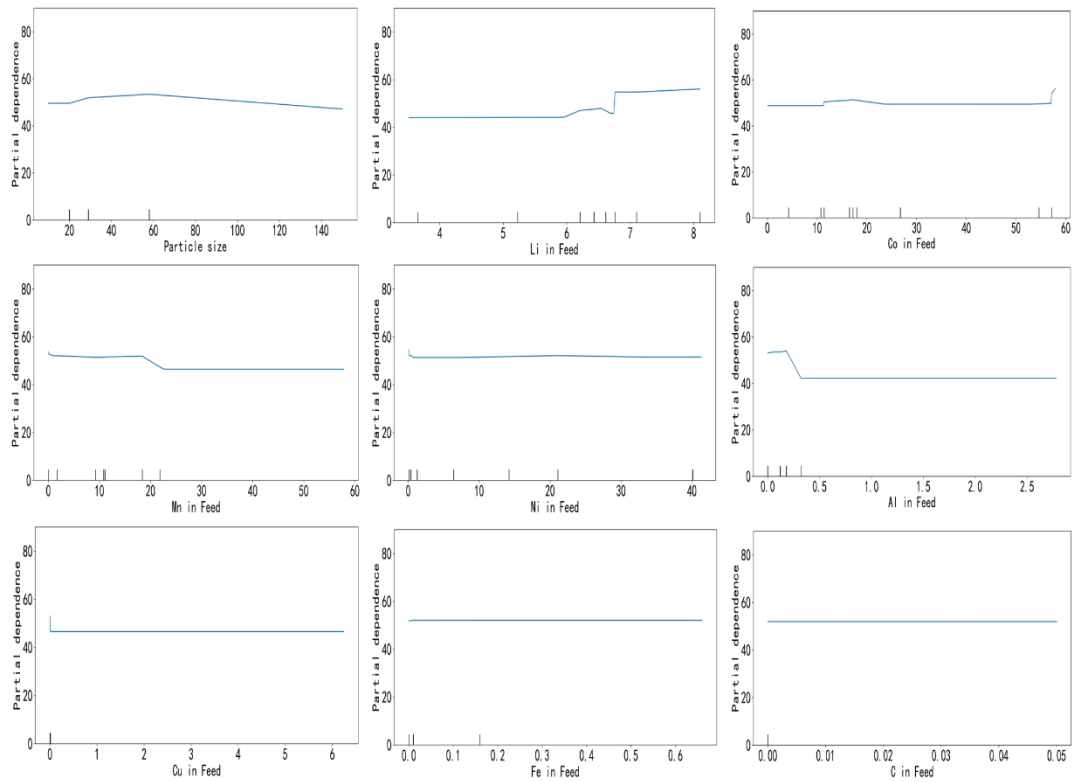

**Figure S7** Partial dependence plots for waste property impacted Co leaching

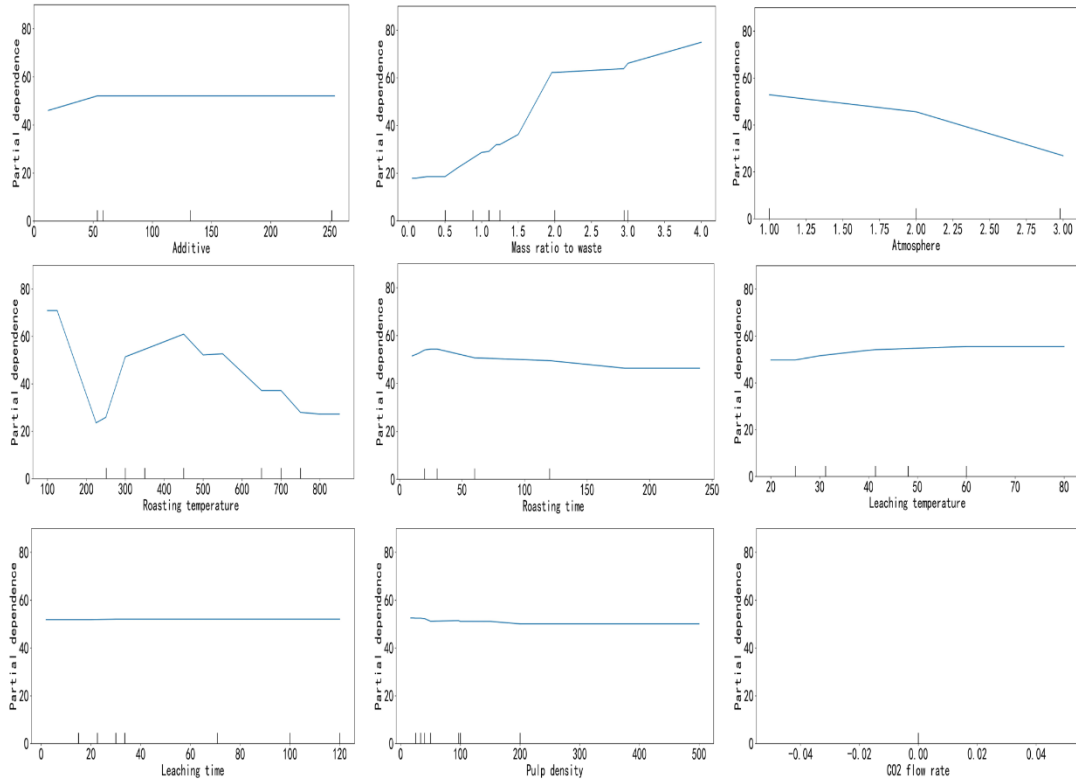

**Figure S8** Partial dependence plots for roasting and water-leaching impacted Co leaching

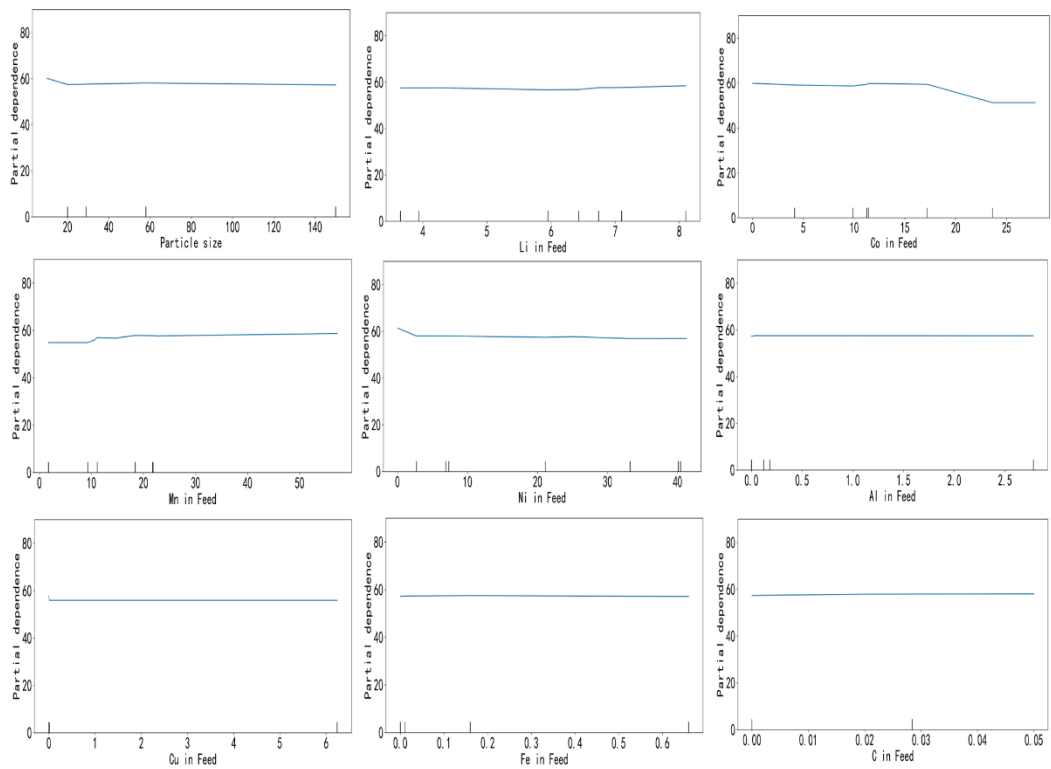

**Figure S9** Partial dependence plots for waste property impacted Mn leaching



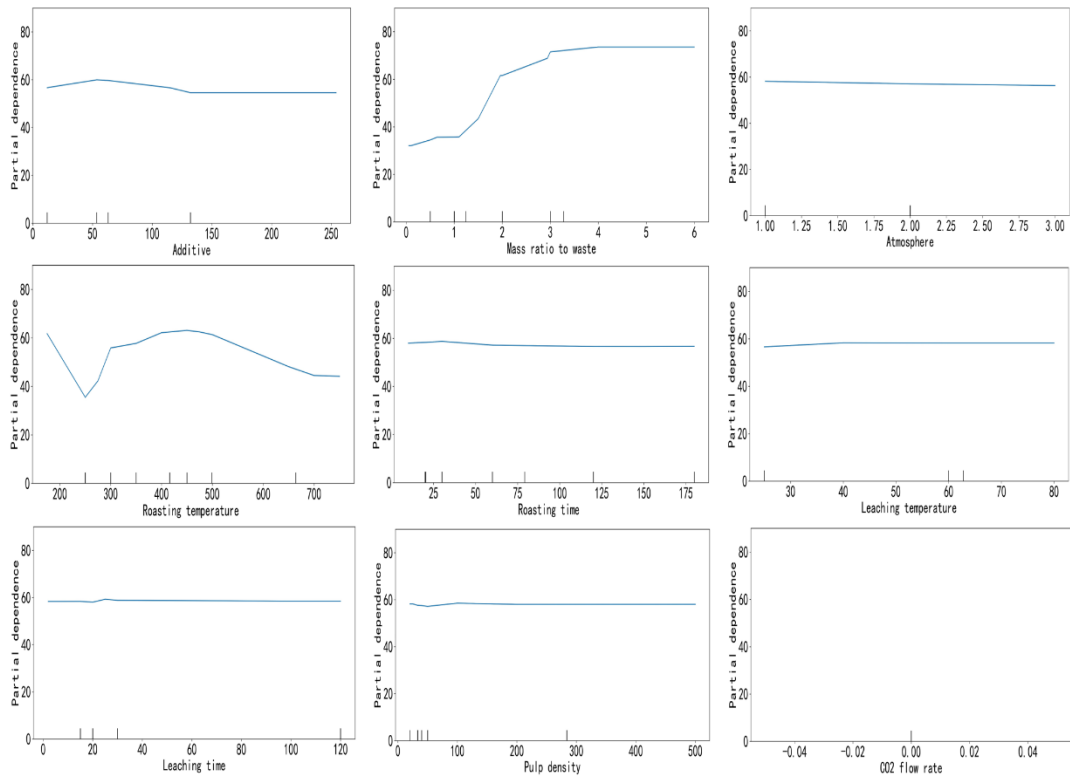

**Figure S10** Partial dependence plots for roasting and water-leaching impacted Mn leaching

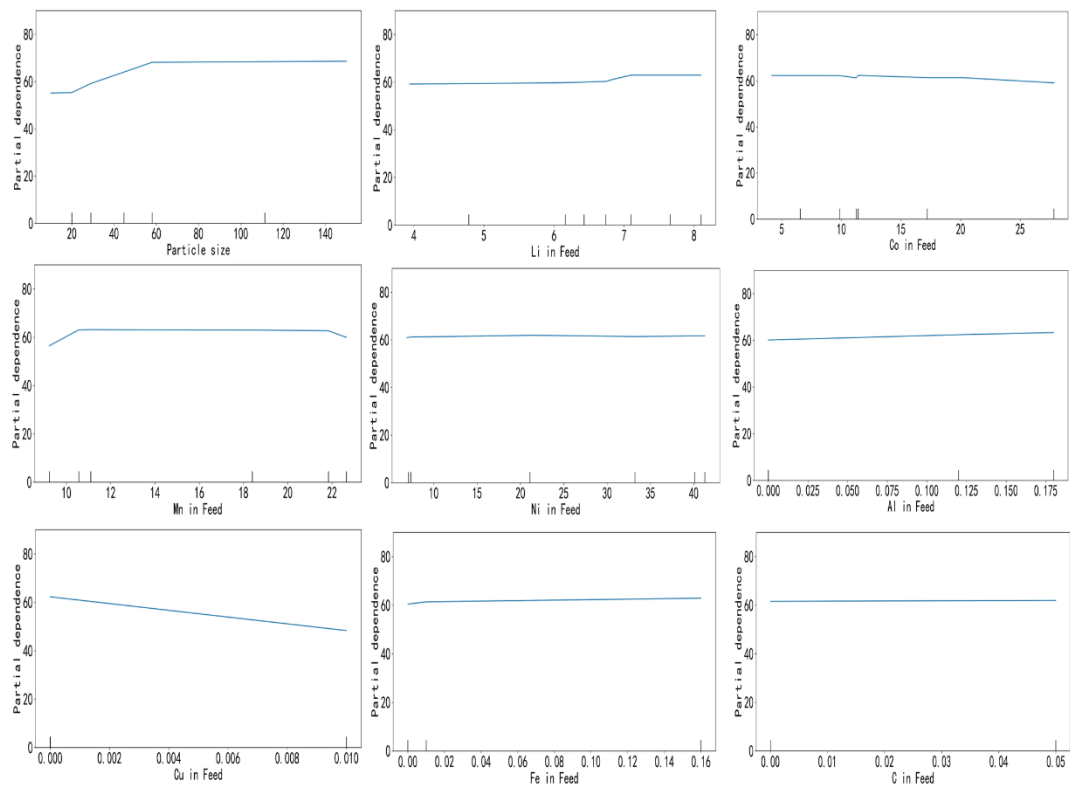

**Figure S11** Partial dependence plots for waste property impacted Ni leaching

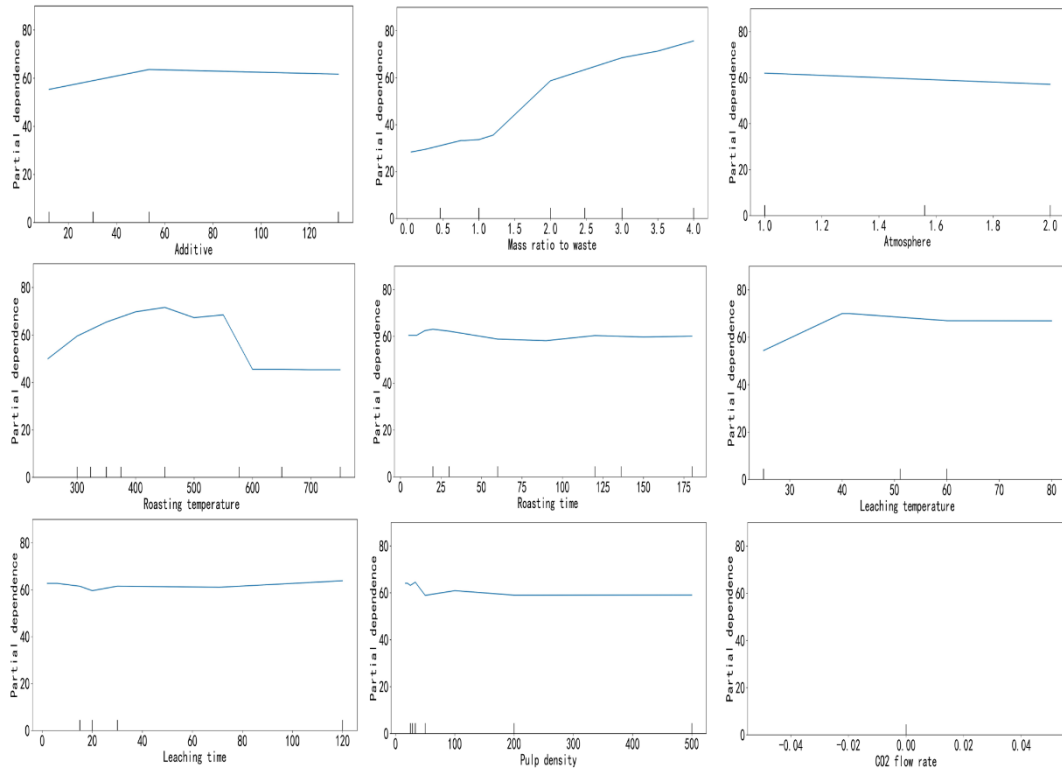

**Figure S12** Partial dependence plots for roasting and water-leaching impacted Ni leaching

**Table S1** The labeled values for the additives and roasting atmosphere used for machine learning

| Additive type                                   | Labeled values |
|-------------------------------------------------|----------------|
| NH <sub>4</sub> Cl                              | 53.5           |
| NH <sub>4</sub> HSO <sub>4</sub>                | 115            |
| (NH <sub>4</sub> ) <sub>2</sub> SO <sub>4</sub> | 132            |
| H <sub>2</sub> SO <sub>4</sub>                  | 98             |
| HNO <sub>3</sub>                                | 63             |
| graphite                                        | 12             |
| Ca(OH) <sub>2</sub>                             | 74             |
| K <sub>2</sub> S <sub>2</sub> O <sub>7</sub>    | 254            |
| Zn                                              | 56             |
| Lignite                                         | 1.1            |
| Bean dregs                                      | 2              |
| Atmosphere                                      |                |
| Air                                             | 1              |
| Inert gas                                       | 2              |
| Vacuum                                          | 3              |

**Note:** These labeled values do not impact the machine learning results but rather facilitate the identification of these input features.

**Table S2** The compositions of waste feed

| Cathode powder                                                     | Particle size<br>(um) | Composition (wt%) |       |       |       |
|--------------------------------------------------------------------|-----------------------|-------------------|-------|-------|-------|
|                                                                    |                       | Li                | Co    | Mn    | Ni    |
| 1-LiCoO <sub>2</sub>                                               | ~50                   | 6.21              | 53.42 | 0.09  | 0.08  |
| 1-LiMn <sub>2</sub> O <sub>4</sub>                                 | ~50                   | 3.96              | 0.08  | 48.7  | 0.06  |
| 1-LiNi <sub>x</sub> Mn <sub>y</sub> Co <sub>z</sub> O <sub>2</sub> | ~50                   | 6.37              | 19.58 | 20.18 | 19.34 |
| 2-LiCoO <sub>2</sub>                                               | ~50                   | 6.41              | 52.35 | -     | -     |
|                                                                    | ~100                  | 6.36              | 51.83 | -     | -     |
| 2-LiNi <sub>x</sub> Mn <sub>y</sub> Co <sub>z</sub> O <sub>2</sub> | ~50                   | 6.25              | 21.24 | 21.37 | 20.88 |
|                                                                    | ~100                  | 6.28              | 21.59 | 20.86 | 21.11 |
| 3-LiCoO <sub>2</sub>                                               | ~50                   | 6.73              | 57.15 | -     | -     |
|                                                                    | ~100                  | 6.69              | 56.97 | -     | -     |
| 3-LiNi <sub>x</sub> Mn <sub>y</sub> Co <sub>z</sub> O <sub>2</sub> | ~50                   | 6.97              | 17.61 | 18.52 | 21.33 |
|                                                                    | ~100                  | 7.02              | 17.42 | 18.73 | 20.14 |

**Note:** the 1, 2 and 3 (such as 1- LiCoO<sub>2</sub>, 2-LiCoO<sub>2</sub>, 3-LiCoO<sub>2</sub> and 3-LiNi<sub>x</sub>Mn<sub>y</sub>Co<sub>z</sub>O<sub>2</sub>)

repeat different commercial LIBs from different companies.

**Table S3** The experimental roasting and water-leaching parameters were set according to the GUI

| Waste feed                                                         | Additive           | Mass ratio<br>of additive<br>to waste | Roasting<br>temperature<br>(°C) | Roasting<br>time<br>(min) | Atmosphere | Leaching<br>temperature<br>(°C) | Leaching<br>time (min) | Pulp<br>density<br>(g/L) | CO <sub>2</sub><br>flow rate<br>(ml/min) |
|--------------------------------------------------------------------|--------------------|---------------------------------------|---------------------------------|---------------------------|------------|---------------------------------|------------------------|--------------------------|------------------------------------------|
| 1-LiCoO <sub>2</sub> (50 um)                                       | graphite           | 0.25                                  | 700                             | 180                       | vacuum     | 25                              | 120                    | 25                       | 30                                       |
|                                                                    | NH <sub>4</sub> Cl | 4.0                                   | 350                             | 30                        | air        | 25                              | 30                     | 150                      | 0                                        |
| 1-LiMn <sub>2</sub> O <sub>4</sub>                                 | graphite           | 0.25                                  | 700                             | 30                        | vacuum     | 25                              | 60                     | 50                       | 30                                       |
|                                                                    | NH <sub>4</sub> Cl | 3.6                                   | 350                             | 30                        | air        | 25                              | 30                     | 150                      | 0                                        |
| 1-LiNi <sub>x</sub> Mn <sub>y</sub> CoO <sub>2</sub>               | graphite           | 0.25                                  | 750                             | 180                       | vacuum     | 25                              | 20                     | 25                       | 30                                       |
|                                                                    | NH <sub>4</sub> Cl | 3.8                                   | 350                             | 25                        | air        | 25                              | 120                    | 160                      | 0                                        |
| 2-LiCoO <sub>2</sub>                                               | graphite           | 0.28                                  | 700                             | 150                       | vacuum     | 25                              | 30                     | 30                       | 25.5                                     |
|                                                                    | ~100 um            | graphite                              | 0.28                            | 700                       | vacuum     | 25                              | 30                     | 30                       | 25.5                                     |
|                                                                    | ~100 um            | NH <sub>4</sub> Cl                    | 4.0                             | 300                       | 20         | air                             | 25                     | 30                       | 170                                      |
| 2-LiNi <sub>x</sub> Mn <sub>y</sub> Co <sub>z</sub> O <sub>2</sub> | graphite           | 0.5                                   | 680                             | 100                       | vacuum     | 25                              | 30                     | 30                       | 30                                       |
|                                                                    | ~100 um            | NH <sub>4</sub> Cl                    | 3.8                             | 375                       | 30         | air                             | 25                     | 30                       | 200                                      |
| 3-LiCoO <sub>2</sub>                                               | graphite           | 0.25                                  | 700                             | 100                       | vacuum     | 25                              | 30                     | 25                       | 30                                       |
|                                                                    | ~100 um            | NH <sub>4</sub> Cl                    | 4.0                             | 320                       | 20         | air                             | 30                     | 20                       | 250                                      |
| 3-LiNi <sub>x</sub> Mn <sub>y</sub> Co <sub>z</sub> O <sub>2</sub> | graphite           | 0.5                                   | 680                             | 100                       | vacuum     | 25                              | 30                     | 30                       | 30                                       |
|                                                                    | ~100 um            | NH <sub>4</sub> Cl                    | 3.5                             | 300                       | 30         | air                             | 30                     | 30                       | 250                                      |

**Note:** for the waste feed, the particle sizes are all ~50 um except the sample marked as (100) with ~100 um.

**Table S4** The comparison with the traditional optimization and ML approach about the consumption of chemicals and electric energy and the production of waste water

| during                                 |                  |                                    |                        |                                      |
|----------------------------------------|------------------|------------------------------------|------------------------|--------------------------------------|
| Optimizing parameters                  | Parameter values | NH <sub>4</sub> Cl consumption (g) | Electric energy (kW•h) | Leaching waste water production (mL) |
| <sup>a</sup> NH <sub>4</sub> Cl (g)    | 5                | 5                                  | 2                      | 60                                   |
|                                        | 10               | 10                                 | 2                      | 60                                   |
|                                        | 15               | 15                                 | 2                      | 60                                   |
|                                        | 20               | 20                                 | 2                      | 60                                   |
|                                        | 25               | 25                                 | 2                      | 60                                   |
| <sup>b</sup> Roasting temperature (°C) | 300              | 20                                 | 2                      | 60                                   |
|                                        | 350              | 20                                 | 2                      | 60                                   |
|                                        | 400              | 20                                 | 2                      | 60                                   |
|                                        | 450              | 20                                 | 2                      | 60                                   |
|                                        | 500              | 20                                 | 2                      | 60                                   |
| <sup>c</sup> Roasting time (min)       | 10               | 20                                 | 0.7                    | 60                                   |
|                                        | 20               | 20                                 | 1.3                    | 60                                   |
|                                        | 30               | 20                                 | 2                      | 60                                   |
|                                        | 60               | 20                                 | 4                      | 60                                   |
|                                        | 90               | 20                                 | 6                      | 60                                   |
| <b>Total</b>                           | -                | <b>275</b>                         | <b>34</b>              | <b>900</b>                           |
| <b>ML (only one-time experiment)</b>   | -                | <b>20</b>                          | <b>1.3</b>             | <b>52</b>                            |

**Note:** we take the roasting of one type of spent LiCoO<sub>2</sub> (5 g) with NH<sub>4</sub>Cl followed by water leaching as a typical example. The LiCoO<sub>2</sub> was chosen as the sample in **Table S2** of 2-LiCoO<sub>2</sub> with the particle size ~100 um. During the traditional optimization, we considered the NH<sub>4</sub>Cl additive amount, roasting temperature, and roasting time as the required optimizing parameters, while the water leaching process was controlled as the

leaching temperature of 25 °C, pulp density of 150 g/L, and leaching time of 30 min. The power of the Muffle furnace used for the roasting process was 4 kW. The marked blue superscripts a, b, and c represent controlling other parameter values. **a**: roasting temperature of 400 °C, roasting time of 30 min; **b**: NH<sub>4</sub>Cl additive amount of 20 g, roasting time of 30 min; **c**: roasting temperature of 300 °C, NH<sub>4</sub>Cl additive amount of 20 g. After the roasting process under different conditions (as listed in **Table S3**), the mass of products (LiCl, CoCl<sub>2</sub>, and residual LiCoO<sub>2</sub>) was about 6~8.8 g. Then, the water-leaching process was conducted. Since the pulp density of 150 g/L, the added H<sub>2</sub>O amount was 40~60 mL. Since most of the mass of products after roasting was distributed around 8.8 g, we chose the water-adding amount as 60 mL. Therefore, after each water leaching, the production amount of wastewater was about 60 mL. The GUI based on machine learning provided the parameters of NH<sub>4</sub>Cl additive amount of 20 g, roasting temperature of 300 °C, roasting time of 20 min, leaching temperature of 25 °C, pulp density of 170 g/L and leaching time of 30 min.
